# Supplementary material
Source: PubMed Central journal article supplement (PMC6166862)
Supplement: NIHMS79043-supplement-1.pdf [file NIHMS79043-supplement-1.pdf]

## **Sustainability of artisanal mining of cobalt in DR Congo.**

Célestin BANZA LUBABA NKULU, Lidia CASAS, Vincent HAUFROID, Thierry DE PUTTER, Nelly D. SAENEN, Tony KAYEMBE KITENGE, Paul MUSA OBADIA, Daniel KYANIKA WA MUKOMA, Jean-Marie LUNDA ILUNGA, Tim S. NAWROT, Oscar LUBOYA NUMBI, Erik SMOLDERS, Benoit NEMERY

### **Supplementary material**

**Supplementary Figure 1.** Photographs from the surveyed urban areas in Kolwezi

**Supplementary Figure 2.** Relation of concentrations of cobalt (Co), manganese (Mn), cadmium (Cd) and lead (Pb) in urine (-U) and in blood (-B)

**Supplementary Table 1:** *Aqua regia* soluble concentrations of trace metals ( $\mu\text{g/g}$  dry matter) in surface dust collected from control and exposed areas and in samples of ore.

**Supplementary Table 2:** Concentrations of trace metals ( $\mu\text{g/L}$ ) in drinking water collected from control and exposed areas.

**Supplementary Table 3:** Concentrations ( $\mu\text{g/g}$  creatinine) of trace metals in urine from 88 residents according to exposure

**Supplementary Table 4:** Concentrations ( $\mu\text{g/g}$  creatinine) of trace metals in urine from 88 residents according to exposure and stratified by age, and 23 artisanal mineworkers (diggers)

**Supplementary Table 5:** Concentrations ( $\mu\text{g/dL}$ ) of trace metals in blood from 33 residents according to exposure

**Supplementary Table 6:** Concentrations ( $\mu\text{g/dL}$ ) of trace metals in blood from 33 residents according to exposure and stratified by age, and 10 artisanal mineworkers (diggers)

**Supplementary Figure 1.** Photographs from the surveyed urban areas in Kolwezi

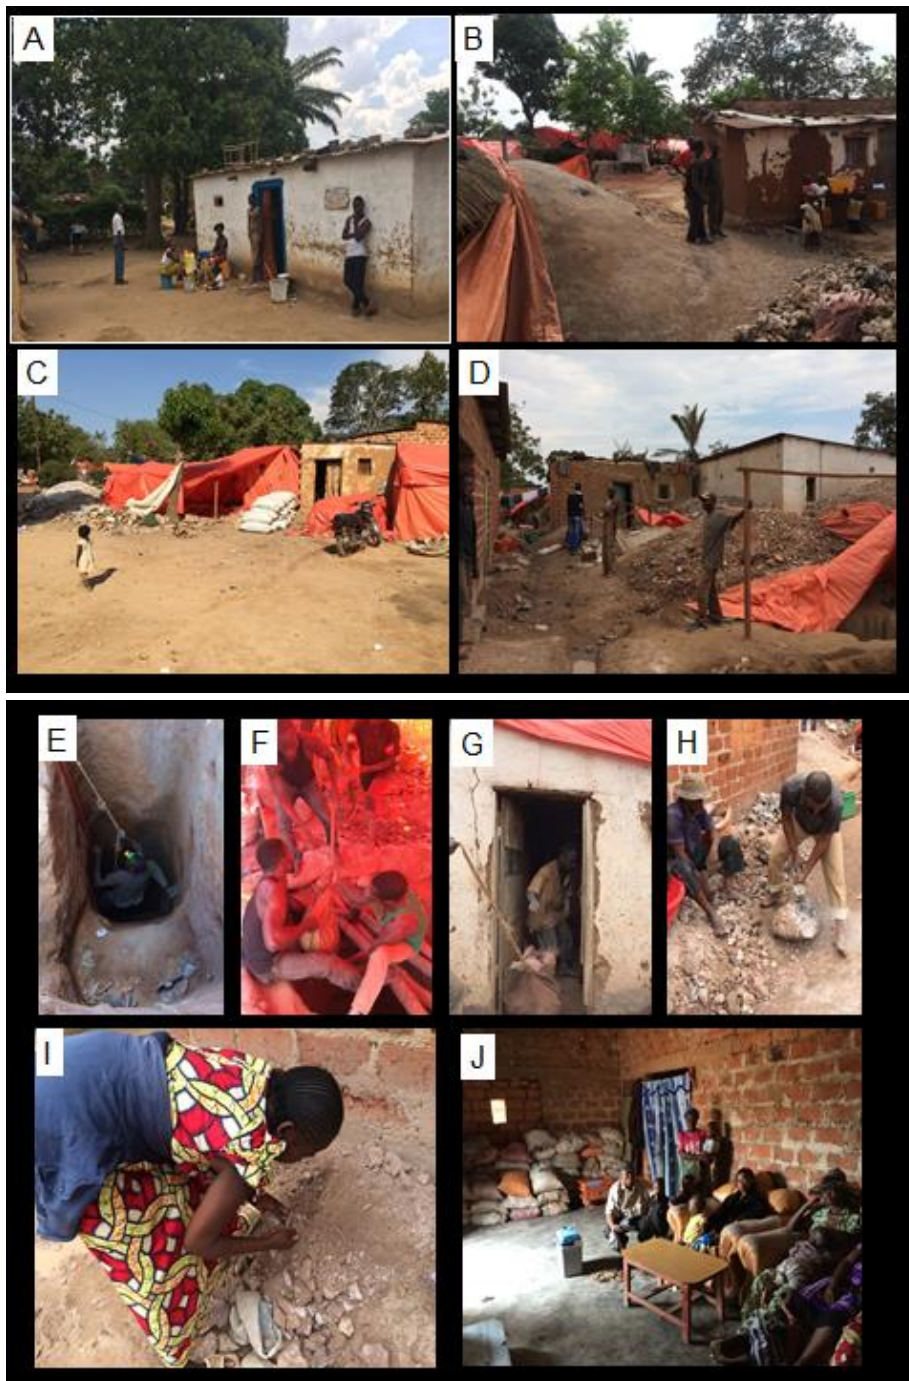

*Photographs of a plot in the control area without mining (A) and of various plots in the mining area (B, C, D) showing the presence of numerous mine pits, covered by orange plastic sheeting, and mine tailings close to houses; a mineworker descending in a mine pit (E); mineworkers hoisting a bag of ore from a mine pit under plastic sheeting (F), and from a pit dug inside a house (G); mineworkers crushing blocks of ore containing black heterogenite (H); a woman collecting pieces of ore (I); a living room with bags of ore stored in the back of the room (J). Photographs D, H, I, and J were taken from the same plot. Letters do not correspond with codes of plots in Figure 1. (Photographs taken by B. Nemery, November 2014).*

**Supplementary Figure 2.** Relation of concentrations of cobalt (Co), manganese (Mn), cadmium (Cd) and lead (Pb) in urine (-U) and in blood (-B)

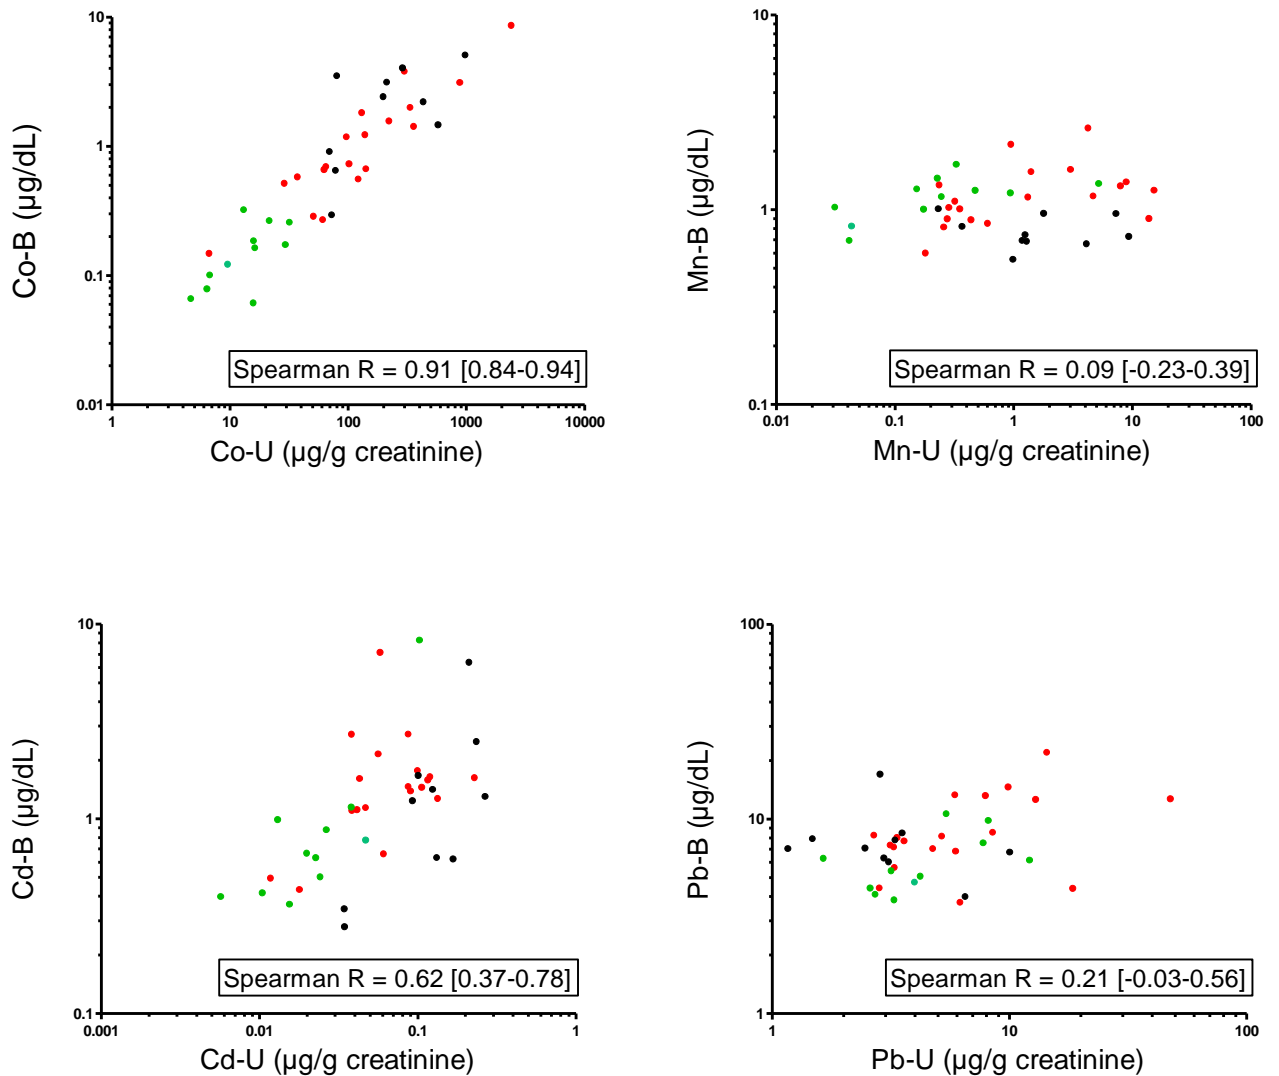

Individual data from control residents (green symbols), exposed residents (red symbols) and diggers (black symbols). Note logarithmic scales for both x-axis and y-axis. Values of Spearman's rank correlation coefficient  $R$  are shown with 95% confidence intervals. The correlation between Pb-B and Pb-U is not significant ( $p=0.07$ ), but the correlation is significant when Pb-U is expressed as µg/L instead of µg/g creatinine (Spearman  $R = 0.50$  [0.23-0.70],  $p<0.001$ ).

**Supplementary Table 1:** *Aqua regia* soluble concentrations of trace metals ( $\mu\text{g/g}$  dry matter) in surface dust collected from control and exposed areas and in samples of ore.

|    | LOQ  | CONTROL AREA<br>(5 plots) |      |      | EXPOSED AREA<br>(9 plots) |      |       | GM ratio (95% CI)<br>EXPOSED/CONTROL | ORE<br>(3 samples) |       |       | GM ratio (95% CI)<br>ORE/CONTROL |
|----|------|---------------------------|------|------|---------------------------|------|-------|--------------------------------------|--------------------|-------|-------|----------------------------------|
|    |      | min                       | GM   | max  | min                       | GM   | max   |                                      | min                | GM    | max   |                                  |
| Al | 20   | 3910                      | 5130 | 7010 | 4130                      | 6110 | 10410 | 1.2 (0.8-1.7)                        | 6400               | 8300  | 10900 | <b>1.6 (1.0-2.6)</b>             |
| Ti | 15   | 68                        | 91   | 178  | 64                        | 82   | 140   | 0.9 (0.5-1.6)                        | 9                  | 27    | 63    | <b>0.3 (0.1-0.6)</b>             |
| V  | 0.7  | 7                         | 9    | 11   | 18                        | 39   | 106   | <b>4.6 (2.6-8.1)</b>                 | 149                | 206   | 309   | <b>24.0 (11.4-50.4)</b>          |
| Cr | 0.8  | 5                         | 6    | 11   | 7                         | 11   | 16    | <b>1.7 (1.2-2.5)</b>                 | 7                  | 9     | 12    | 1.5 (0.9-2.4)                    |
| Mn | 4    | 31                        | 39   | 66   | 72                        | 178  | 458   | <b>4.5 (2.0-10.2)</b>                | 590                | 1390  | 3300  | <b>35.5 (12.3-102.6)</b>         |
| Fe | 61   | 1200                      | 2410 | 3690 | 3830                      | 6960 | 12170 | <b>2.9 (1.7-5.9)</b>                 | 2250               | 4650  | 8390  | <b>1.9 (1.0-3.9)</b>             |
| Co | 1    | 6                         | 16   | 41   | 205                       | 1100 | 8140  | <b>69.5 (18.4-263)</b>               | 19900              | 26300 | 41700 | <b>1700 (290-9500)</b>           |
| Ni | 1    | <LOQ                      | 2    | 4    | 2                         | 10   | 72    | <b>4.5 (1.3-15.5)</b>                | 127                | 223   | 636   | <b>106 (21.3-527)</b>            |
| Cu | 4    | 27                        | 91   | 555  | 50                        | 193  | 606   | 2.1 (0.7-6.7)                        | 1130               | 1470  | 2450  | <b>16.2 (3.6-72.3)</b>           |
| Zn | 6    | 21                        | 29   | 46   | 24                        | 41   | 90    | 1.4 (0.8-2.3)                        | 19                 | 29    | 51    | 1.0 (0.5-1.9)                    |
| As | 0.8  | <LOQ                      | 0.6  | 1.0  | <LOQ                      | 3    | 7     | <b>4.3 (2.2-8.6)</b>                 | 12                 | 16    | 24    | <b>26.3 (10.7-65.0)</b>          |
| Se | 3    |                           |      |      |                           |      |       |                                      |                    |       |       |                                  |
| Y  | 0.2  | 0.4                       | 0.7  | 1.1  | 1.6                       | 4    | 8     | <b>5.7 (2.8-11.6)</b>                | 6                  | 15    | 25    | <b>23.0 (9.0-58.3)</b>           |
| Zr | 0.3  | <LOQ                      | 0.9  | 4.3  | 0.4                       | 1.1  | 3.3   | 1.3 (0.4-3.6)                        | <LOQ               | 0.4   | 0.9   | 0.5 (0.1-1.9)                    |
| Mo | 0.6  | <LOQ                      | 0.3  | 0.3  | <LOQ                      | 0.9  | 4.4   | 2.8 (0.9-8.4)                        | 2                  | 8     | 45    | <b>24.2 (5.7-102)</b>            |
| Cd | 0.5  |                           |      |      |                           |      |       |                                      |                    |       |       |                                  |
| Sn | 3    |                           |      |      |                           |      |       |                                      |                    |       |       |                                  |
| Sb | 0.1  | <LOQ                      | 0.1  | 0.3  | <LOQ                      | 0.2  | 0.7   | <b>2.4 (1.1-5.1)</b>                 | 0.4                | 0.4   | 0.4   | <b>4.3 (1.6-11.5)</b>            |
| La | 0.03 | 1                         | 2    | 3    | 5                         | 9    | 19    | <b>3.7 (1.9-7.2)</b>                 | 9                  | 22    | 57    | <b>9.6 (4.1-22.6)</b>            |
| Ce | 0.03 | 3                         | 5    | 7    | 8                         | 21   | 66    | <b>4.2 (1.9-9.0)</b>                 | 73                 | 96    | 163   | <b>19.1 (6.9-52.6)</b>           |
| Nd | 0.06 | 1                         | 2    | 3    | 4                         | 8    | 26    | <b>4.7 (2.4-9.2)</b>                 | 15                 | 23    | 36    | <b>12.9 (5.4-31.1)</b>           |
| Pb | 0.4  | 3                         | 5    | 7    | 4                         | 9    | 20    | <b>1.9 (1.0-3.6)</b>                 | 20                 | 33    | 54    | <b>7.0 (3.0-16.0)</b>            |
| U  | 0.05 | 0.05                      | 0.15 | 0.25 | 0.4                       | 2    | 15    | <b>13.3 (4.1-43.3)</b>               | 28                 | 44    | 83    | <b>301 (64.5-1408)</b>           |

Concentrations are expressed as  $\mu\text{g/g}$  dry matter (rounded to three significant digits). In each plot, a sample of surface dust was collected outdoor and indoor. As the metal concentrations were similar in indoor and outdoor dust, the average metal concentration was calculated for each plot. The data shown are the minimum value (min), geometric mean (GM) and maximum value (max) of these average metal concentrations in surface dust, and in 3 samples of ore. LOQ is Limit of Quantification (average values of two different runs of measurements). For the calculation of GM, a value of  $\frac{1}{2}$  LOQ was attributed for concentrations < LOQ (for Se, Cd, and Sn all values were <LOQ). GM ratios are given with their 95% confidence interval (CI) and shown in bold when significantly different from 1.

**Supplementary Table 2:** Concentrations of trace metals ( $\mu\text{g/L}$ ) in drinking water collected from control and exposed areas.

|           | Drinking water standard † | LOQ   | CONTROL AREA (5 samples)* |       |      | EXPOSED AREA (7 samples)** |      |      | GM ratio (95% CI) EXPOSED/CONTROL |
|-----------|---------------------------|-------|---------------------------|-------|------|----------------------------|------|------|-----------------------------------|
|           |                           |       | min                       | GM    | max  | min                        | GM   | max  |                                   |
| <b>Al</b> | 900                       | 0.75  | 1.1                       | 6.0   | 53   | 1.3                        | 11   | 50   | 1.8 (0.3-13.0)                    |
| <b>Ti</b> |                           | 0.00  | <LOQ                      | 0.15  | 0.30 | <LOQ                       | 0.02 | 0.11 | 0.1 (0.0-2.4)                     |
| <b>V</b>  |                           | 0.01  | 0.30                      | 0.45  | 0.81 | 0.07                       | 0.18 | 0.70 | <b>0.4 (0.2-1.0)</b>              |
| <b>Cr</b> | 50                        | 0.03  | <LOQ                      | 0.09  | 0.79 | <LOQ                       | 0.06 | 0.90 | 0.7 (0.1-5.6)                     |
| <b>Mn</b> | 50                        | 0.16  | 1.3                       | 7.9   | 80   | 4.7                        | 19   | 71   | 2.4 (0.5-12.7)                    |
| <b>Fe</b> | 300                       | 0.81  | <LOQ                      | 2.5   | 47   | <LOQ                       | 4.9  | 21   | 1.9 (0.2-19.9)                    |
| <b>Co</b> |                           | 0.01  | 1.5                       | 5.6   | 45   | 3.1                        | 9.9  | 100  | 1.8 (0.4-7.1)                     |
| <b>Ni</b> | 70                        | 0.08  | 0.19                      | 0.84  | 3.0  | 0.25                       | 0.98 | 4.2  | 1.2 (0.3-4.8)                     |
| <b>Cu</b> | 2000                      | 0.26  | 0.67                      | 3.7   | 33   | 1.7                        | 8.5  | 62   | 2.3 (0.5-10.9)                    |
| <b>Zn</b> | 5000                      | 0.41  | 1.0                       | 8.0   | 29   | 5.1                        | 40   | 1486 | 5.0 (0.7-34.4)                    |
| <b>As</b> | 10                        | 0.05  | <LOQ                      | 0.08  | 0.31 | <LOQ                       | 0.07 | 0.25 | 0.8 (0.3-2.4)                     |
| <b>Se</b> | 40                        | 0.13  | <LOQ                      | 0.15  | 0.37 | <LOQ                       | 0.09 | 0.44 | 0.6 (0.2-1.9)                     |
| <b>Y</b>  |                           | 0.004 | <LOQ                      | 0.01  | 0.03 | 0.03                       | 0.38 | 7.0  | 45.4 (1.0-2063)                   |
| <b>Zr</b> |                           | 0.02  | 0.02                      | 0.04  | 0.06 | <LOQ                       | 0.02 | 0.03 | 0.5 (0.1-2.7)                     |
| <b>Mo</b> |                           | 0.03  | <LOQ                      | 0.04  | 0.42 | <LOQ                       | 0.07 | 0.28 | 1.6 (0.2-12.3)                    |
| <b>Cd</b> | 3                         | 0.01  | 0.01                      | 0.03  | 0.15 | 0.01                       | 0.04 | 0.41 | 1.3 (0.4-5.0)                     |
| <b>Sn</b> |                           | 0.12  | <LOQ                      | 0.10  | 0.13 | <LOQ                       | 0.11 | 0.28 | 1.0 (0.2-5.1)                     |
| <b>Sb</b> | 20                        | 0.005 | 1.4                       | 2.1   | 4.1  | 1.2                        | 1.5  | 1.9  | 0.7 (0.4-1.5)                     |
| <b>La</b> |                           | 0.002 | 0.002                     | 0.007 | 0.07 | 0.008                      | 0.17 | 11   | 22.8 (0.2-3279)                   |
| <b>Ce</b> |                           | 0.001 | 0.002                     | 0.01  | 0.20 | 0.005                      | 0.15 | 12   | 14.1 (0.1-3433)                   |
| <b>Nd</b> |                           | 0.003 | <LOQ                      | 0.008 | 0.09 | 0.02                       | 0.20 | 6    | 24.8 (0.4-1681)                   |
| <b>Pb</b> | 10                        | 0.03  | <LOQ                      | 0.02  | 0.08 | <LOQ                       | 0.07 | 1.0  | 2.9 (0.3-26.9)                    |
| <b>U</b>  | 30                        | 0.003 | 0.004                     | 0.02  | 0.43 | <LOQ                       | 0.02 | 0.12 | 0.7 (0.1-4.5)                     |

† Standards for drinking water as available from the World Health Organization. *Guidelines for drinking-water quality. Fourth edition.* (2011). Available at [www.who.int/water\\_sanitation\\_health/publications/2011/9789241548151\\_toc.pdf](http://www.who.int/water_sanitation_health/publications/2011/9789241548151_toc.pdf)

Concentrations are expressed as  $\mu\text{g/L}$  water. From each household (except two households in the exposed area) a sample of drinking water was obtained. The data shown are the minimum value (min), geometric mean (GM) and maximum value (max). LOQ is Limit of Quantification (average values of two different runs of measurements). For the calculation of GM, a value of  $\frac{1}{2}$  LOQ was attributed for concentrations < LOQ. GM ratios are given with their 95% confidence interval (CI) and shown in bold when significantly different from 1.

**Supplementary Table 3:** Concentrations ( $\mu\text{g/g}$  creatinine) of trace metals in urine from 88 residents according to exposure

|                         | Reference values † |             | CONTROL AREA<br>(23 subjects) | EXPOSED AREA<br>(65 subjects) | GM ratio (95% CI)<br>EXPOSED/CONTROL |                            |                              |
|-------------------------|--------------------|-------------|-------------------------------|-------------------------------|--------------------------------------|----------------------------|------------------------------|
|                         | median             | upper limit | GM (95% CI)                   | GM (95% CI)                   | crude                                | adjusted for age & sex     | adjusted for age, sex & plot |
| <b>Creatinine (g/L)</b> |                    |             | 0.91 (0.70-1.19)              | 1.04 (0.91-1.20)              | 1.12 (0.83-1.51)                     | 1.11 (0.81-1.51)           | 1.09 (0.72-1.67)             |
| <b>Li</b>               | 21.5               | 100         | 17.6 (13.7-22.6)              | 28.6 (25.1-32.5)              | <b>1.62*** (1.25-2.10)</b>           | <b>1.55*** (1.20-2.02)</b> | <b>1.65** (1.15-2.34)</b>    |
| <b>Al</b>               | 2.04               | 10          | 23.4 (16.4-33.3)              | 25.3 (20.6-31.0)              | 1.08 (0.72-1.61)                     | 1.21 (0.82-1.78)           | 1.35 (0.85-2.14)             |
| <b>V</b>                | 0.22               | 2.0         | 0.61 (0.49-0.76)              | 0.78 (0.65-0.92)              | 1.26 (0.93-1.73)                     | 1.31 (0.96-1.79)           | 1.49 (0.90-2.46)             |
| <b>Cr</b>               | 0.11               | 0.35        | 0.32 (0.25-0.39)              | 0.38 (0.31-0.47)              | 1.21 (0.84-1.74)                     | 1.26 (0.88-1.81)           | 1.31 (0.90-1.92)             |
| <b>Mn</b>               | <0.043             | 1           | 0.47 (0.25-0.87) #            | 0.90 (0.64-1.25)              | 1.91 (0.98-3.71)                     | <b>2.36** (1.25-4.46)</b>  | <b>2.51** (1.27-4.90)</b>    |
| <b>Co</b>               | 0.20               | 1.3         | 15.0 (10.6-21.2)              | 101 (75.3-135)                | <b>6.73*** (3.95-11.4)</b>           | <b>7.05*** (4.29-11.6)</b> | <b>6.69*** (3.25-13.9)</b>   |
| <b>Ni</b>               | 1.79               | 5           | 4.01 (3.16-5.08)              | 5.11 (4.13-6.31)              | 1.27 (0.87-1.86)                     | 1.29 (0.88-1.88)           | 1.46 (0.87-2.48)             |
| <b>Cu</b>               | 6.99               | 14          | 16.4 (13.4-20.0)              | 18.8 (16.1-21.8)              | 1.15 (0.87-1.52)                     | 1.12 (0.84-1.49)           | 1.25 (0.85-1.82)             |
| <b>Zn</b>               | 246                | 770         | 352 (273-455)                 | 411 (350-482)                 | 1.16 (0.86-1.58)                     | 1.14 (0.84-1.54)           | 1.17 (0.85-1.62)             |
| <b>As</b>               | 13.7               | 260         | 46.6 (37.4-58.0)              | 42.0 (34.8-50.6)              | 0.90 (0.64-1.26)                     | 0.93 (0.67-1.29)           | 1.09 (0.65-1.84)             |
| <b>Se</b>               | 21.6               | 40          | 34.2 (28.4-41.3)              | 36.4 (32.2-41.1)              | 1.06 (0.86-1.34)                     | 1.09 (0.87-1.37)           | 1.25 (0.87-1.79)             |
| <b>Mo</b>               | 29.8               | 100         | 99.3 (74.4-133)               | 116 (96.7-139)                | 1.17 (0.83-1.65)                     | 1.15 (0.82-1.62)           | 1.32 (0.78-2.25)             |
| <b>Cd</b>               | 0.22               | 0.7         | 0.65 (0.47-0.89)              | 0.77 (0.62-0.95)              | 1.19 (0.80-1.77)                     | 1.16 (0.80-1.69)           | 1.40 (0.80-2.44)             |
| <b>Sn</b>               | 0.35               | 2.5         | 0.45 (0.28-0.72)              | 0.41 (0.32-0.52)              | 0.90 (0.55-1.48)                     | 0.93 (0.60-1.44)           | 1.09 (0.58-2.05)             |
| <b>Sb</b>               | 0.04               | 0.25        | 0.07 (0.05-0.10) #            | 0.11 (0.09-0.14) #            | <b>1.51* (1.03-2.24)</b>             | <b>1.58* (1.09-2.30)</b>   | <b>1.73* (1.05-2.86)</b>     |
| <b>Te</b>               | 0.14               | 0.5         | 0.58 (0.43-0.78)              | 0.43 (0.36-0.51)              | 0.74 (0.54-1.03)                     | 0.76 (0.55-1.06)           | 0.90 (0.52-1.58)             |
| <b>Ba</b>               | 1.86               | 8           | 1.77 (1.10-2.86)              | 2.02 (1.55-2.63)              | 1.15 (0.68-1.94)                     | 1.21 (0.71-2.07)           | 1.28 (0.66-2.48)             |
| <b>Tl</b>               | 0.18               | 0.5         | 0.31 (0.26-0.39)              | 0.25 (0.22-0.30)              | 0.81 (0.61-1.07)                     | 0.84 (0.63-1.11)           | 0.93 (0.61-1.40)             |
| <b>Pb</b>               | 1.78               | 3           | 3.88 (3.04-4.94)              | 4.71 (3.85-5.76)              | 1.21 (0.84-1.75)                     | 1.18 (0.83-1.69)           | 1.31 (0.85-2.01)             |
| <b>U</b>                | <0.007             | 0.04        | 0.03 (0.02-0.04)              | 0.05 (0.04-0.06)              | 1.54 (0.93-2.55)                     | <b>1.66* (1.00-2.77)</b>   | 2.01(0.81-5.00)              |

† Reference values according to Hoet et al. *Clin. Chem. Lab. Med.* **51**, 839–849 (2013)

Subjects with creatinine concentration <0.3 g/L (2 controls, 4 exposed) or >3g/L (2 exposed) have been excluded

# 2 or 3 subjects with values below LOD were given a value of ½ LOD.

Trace metal concentrations are expressed as  $\mu\text{g/g}$  creatinine and presented as geometric means (GM) with 95% confidence intervals (CI). GM ratios are presented with 95% CI and shown in bold when significantly different from 1; \*  $p<0.05$ , \*\*  $p<0.01$ , \*\*\*  $p<0.001$ .

**Supplementary Table 4:** Concentrations (µg/g creatinine) of trace metals in urine from 88 residents according to exposure and stratified by age, and 23 artisanal mineworkers (diggers)

|                     | CONTROL AREA<br>ADULTS N=11<br>CHILDREN N=12<br>GM (95% CI) | EXPOSED AREA<br>ADULTS N=38<br>CHILDREN N=27<br>GM (95% CI) | GM ratio (95% CI)<br>EXPOSED/CONTROL                     |                                                          |                                                          | DIGGERS<br>N=23<br>GM (95% CI) | GM ratio (95% CI) #                                     |                                                          |
|---------------------|-------------------------------------------------------------|-------------------------------------------------------------|----------------------------------------------------------|----------------------------------------------------------|----------------------------------------------------------|--------------------------------|---------------------------------------------------------|----------------------------------------------------------|
|                     |                                                             |                                                             | crude                                                    | adjusted for<br>age & sex                                | adjusted for<br>age, sex & plot                          |                                | crude                                                   | adjusted for<br>age & sex                                |
| Creatinine<br>(g/L) | 0.81 (0.51-1.29)<br><i>1.02 (0.71-1.46)</i>                 | 1.12 (0.93-1.35)<br><i>0.95 (0.76-1.17)</i>                 | 1.30 (0.81-2.10)<br><i>0.93 (0.64-0.74)</i>              | 1.30 (0.81-2.09)<br><i>1.05 (0.75-1.47)</i>              | 1.18 (0.96-2.16)<br><i>1.05 (0.77-1.43)</i>              | 1.44 (1.12-1.86)               | 1.89 (1.11-5.21)<br>1.30 (0.80-2.13)                    | 1.66 (0.88-3.14)<br>1.30 (0.80-2.14)                     |
| Li                  | 25.2 (17.7-35.7)<br><i>12.7 (9.70-16.7)</i>                 | 23.4 (19.8-27.6)<br><i>37.9 (32.2-44.6)</i>                 | 0.93 (0.65-1.32)<br><b>2.98*** (1.23-4.00)</b>           | 0.93 (0.66-1.32)<br><b>2.44*** (1.90-3.15)</b>           | 0.93 (0.67-1.28)<br><b>2.46*** (1.88-3.22)</b>           | 19.8 (15.4-25.3)               | 0.78 (0.53-1.16)<br>0.85 (0.64-1.12)                    | 0.73 (0.46-1.17)<br>0.79 (0.54-1.15)                     |
| Al                  | 21.1 (11.3-39.5)<br><i>23.6 (16.2-40.6)</i>                 | 20.1 (15.7-25.9)<br><i>34.9 (25.4-47.9)</i>                 | 0.95 (0.55-1.66)<br><i>1.36 (0.79-2.35)</i>              | 0.95 (0.56-1.62)<br><b>1.65** (1.11-2.44)</b>            | 1.06 (0.53-2.16)<br><b>1.65** (1.15-2.36)</b>            | 19.5 (14.5-26.3)               | 0.93 (0.53-1.63)<br>0.97 (0.65-1.46)                    | 1.35 (0.70-2.61)<br>1.42 (0.83-2.45)                     |
| V                   | 0.64 (0.44-0.93)<br><i>0.59 (0.44-0.79)</i>                 | 0.61 (0.49-0.76)<br><i>1.09 (0.85-1.38)</i>                 | 0.96 (0.62-1.48)<br><b>1.84** (1.24-2.73)</b>            | 0.95 (0.62-1.47)<br><b>1.69** (1.16-2.45)</b>            | 1.02 (0.58-1.82)<br><i>1.36 (0.79-2.39)</i>              | 1.26 (0.93-1.70)               | <b>1.97** (1.22-3.17)</b><br><b>2.06*** (1.46-2.90)</b> | <b>2.40** (1.35-4.26)</b><br><b>2.51*** (1.57-4.03)</b>  |
| Cr                  | 0.28 (0.19-0.42)<br><i>0.35 (0.24-0.76)</i>                 | 0.29 (0.22-0.38)<br><i>0.55 (0.44-0.72)</i>                 | 1.04 (0.60-1.79)<br><b>1.59* (1.06-2.39)</b>             | 1.03 (0.60-1.79)<br><i>1.38 (0.93-2.04)</i>              | 1.03 (0.62-1.72)<br><b>1.82* (1.14-2.92)</b>             | 0.27 (0.21-0.35)               | 0.98 (0.58-1.67)<br>0.95 (0.65-1.39)                    | 1.03 (0.678-2.43)<br>1.24 (0.73-2.10)                    |
| Mn                  | 0.29 (0.10-0.83)<br><i>0.74 (0.35-1.58)</i>                 | 0.69 (0.47-1.02)<br><i>1.29 (0.78-2.37)</i>                 | <b>2.41* (1.01-5.75)</b><br><i>1.75 (0.63-4.82)</i>      | <b>2.40* (1.06-5.44)</b><br><b>2.73* (1.19-6.29)</b>     | 2.23 (0.84-5.81)<br><b>3.10* (1.28-7.46)</b>             | 1.21 (0.72-2.05)               | <b>4.23** (1.70-10.5)</b><br>1.75 (0.91-3.38)           | <b>8.33*** (2.89-24.0)</b><br><b>3.48** (1.45-8.31)</b>  |
| Co                  | 12.3 (6.45-23.6)<br><i>17.9 (12.3-26.2)</i>                 | 63.8 (44.3-91.9)<br><i>193 (131-294)</i>                    | <b>5.17*** (2.46-10.9)</b><br><b>10.7*** (5.76-20.0)</b> | <b>5.16*** (2.44-10.9)</b><br><b>9.33*** (4.73-18.4)</b> | <b>4.71*** (2.01-11.0)</b><br><b>7.46*** (2.86-19.7)</b> | 133 (83.6-211)                 | <b>10.7*** (4.90-23.7)</b><br><b>2.08* (1.18-3.68)</b>  | <b>10.9*** (4.21-28.1)</b><br><b>2.11* (0.96-4.60)</b>   |
| Ni                  | 4.32 (2.92-6.41)<br><i>3.74 (2.08-3.21)</i>                 | 4.15 (3.14-5.49)<br><i>6.94 (5.00-9.38)</i>                 | 0.96 (0.55-1.66)<br><b>1.83* (1.10-3.04)</b>             | 0.96 (0.55-1.67)<br><i>1.52 (0.87-2.67)</i>              | 1.08 (0.57-2.05)<br><i>1.48 (0.76-2.86)</i>              | 4.31 (3.07-6.03)               | 1.00 (0.56-1.78)<br>1.04 (0.61-1.79)                    | 1.07 (0.53-2.15)<br>1.11 (0.62-1.98)                     |
| Cu                  | 15.5 (10.7-22.4)<br><i>24.3 (13.4-22.2)</i>                 | 15.5 (12.7-19.1)<br><i>24.3 (20.2-29.7)</i>                 | 1.01 (0.66-1.53)<br><b>1.42* (1.02-1.97)</b>             | 1.01 (0.67-1.52)<br><i>1.35 (0.92-1.99)</i>              | 1.11 (0.70-1.73)<br><i>1.25 (0.89-1.75)</i>              | 15.4 (12.3-19.4)               | 1.00 (0.65-1.53)<br>0.99 (0.73-1.35)                    | 0.99 (0.59-1.64)<br>0.99 (0.65-1.49)                     |
| Zn                  | 356 (214-593)<br><i>348 (267-457)</i>                       | 340 (273-423)<br><i>535 (437-657)</i>                       | 0.95 (0.59-1.53)<br><b>1.53* (1.09-2.16)</b>             | 0.96 (0.59-1.55)<br><i>1.15 (0.88-1.51)</i>              | 0.96 (0.61-1.51)<br><i>1.35 (0.95-1.92)</i>              | 373 (277-504)                  | 1.05 (0.60-1.53)<br>1.10 (0.76-1.58)                    | 0.94 (0.51-1.74)<br>0.98 (0.59-1.63)                     |
| As                  | 39.7 (26.8-58.9)<br><i>53.9 (42.0-69.2)</i>                 | 34.2 (26.7-43.7)<br><i>58.0 (42.6-73.6)</i>                 | 0.86 (0.52-1.41)<br><i>1.04 (0.67-1.60)</i>              | 0.86 (0.52-1.42)<br><i>0.89 (0.58-1.35)</i>              | 0.95 (0.51-1.79)<br><i>0.96 (0.58-1.60)</i>              | 42.7(28.78-63.3)               | 1.08 (0.61-1.91)<br>1.25 (0.83-1.89)                    | 1.07 (0.53-2.14)<br>1.24 (0.70-2.20)                     |
| Se                  | 33.9 (22.8-50.3)<br><i>34.5 (22.5-40.3)</i>                 | 30.2 (26.1-35.0)<br><i>47.3 (39.7-56.4)</i>                 | 0.89 (0.64-1.24)<br><b>1.37* (1.04-1.81)</b>             | 0.89 (0.64-1.23)<br><i>1.23 (0.93-1.62)</i>              | 1.01 (0.67-1.52)<br><i>1.42 (1.00-2.01)</i>              | 29.7 (24.0-36.8)               | 0.88 (0.62-1.25)<br>0.98 (0.76-1.27)                    | 1.06 (0.70-1.62)<br>1.19 (0.84-1.69)                     |
| Mo                  | 88.8 (60.5-130)<br><i>110 (88.2-178)</i>                    | 95.2 (75.9-120)<br><i>153 (110-208)</i>                     | 1.07 (0.68-1.70)<br><i>1.39 (0.84-2.31)</i>              | 1.07 (0.67-1.72)<br><i>1.13 (0.65-1.96)</i>              | 1.26 (0.73-2.20)<br><i>1.17 (0.61-2.27)</i>              | 72.9 (53.1-100)                | 0.82 (0.67-1.72)<br>0.77 (0.53-1.10)                    | 0.75 (0.41-1.39)<br>0.70 (0.42-1.16)                     |
| Cd                  | 0.84 (0.48-1.49)<br><i>0.59 (0.36-0.71)</i>                 | 0.88 (0.64-1.21)<br><i>0.64 (0.40-0.82)</i>                 | 1.04 (0.54-1.99)<br><i>1.26 (0.82-1.93)</i>              | 1.03 (0.58-1.84)<br><i>0.99 (0.63-1.54)</i>              | 1.22 (0.64-2.36)<br><i>1.15 (0.69-1.92)</i>              | 0.58 (0.38- 89)                | 0.69 (0.34-1.39)<br>0.66 (0.40-1.10)                    | 1.19 (0.55-2.57)<br>1.15 (0.61-2.16)                     |
| Sn                  | 0.22 (0.15-0.30)<br><i>0.89 (0.47-1.89)</i>                 | 0.26 (0.21-0.32)<br><i>0.79 (0.52-1.18)</i>                 | 1.19 (0.77-1.85)<br><i>0.88 (0.43-1.80)</i>              | 1.19 (0.76-1.85)<br><i>0.53 (0.27-1.06)</i>              | 1.21 (0.77-1.90)<br><i>0.68 (0.31-1.49)</i>              | 0.26 (0.16-0.41)               | 1.20 (0.67-2.14)<br>1.01 (0.66-1.53)                    | 1.36 (0.67-2.76)<br>1.14 (0.64-2.05)                     |
| Sb                  | 0.06 (0.04-0.10)<br><i>0.09 (0.05-0.15)</i>                 | 0.09 (0.07-0.12)<br><i>0.15 (0.12-0.19)</i>                 | 1.44 (0.81-2.58)<br><b>1.77* (1.10-2.86)</b>             | 1.44 (0.82-2.51)<br><i>1.45 (0.85-2.47)</i>              | 1.43 (0.85-2.41)<br><i>1.60 (0.89-2.89)</i>              | 0.04 (0.03-0.06)               | 0.70 (0.39-1.26)<br><b>0.49*** (0.32-0.74)</b>          | 0.88 (0.44-1.73)<br>0.61 (0.34-1.07)                     |
| Te                  | 0.58 (0.32-1.08)<br><i>0.58 (0.44-0.75)</i>                 | 0.35 (0.29-0.43)<br><i>0.57 (0.43-0.75)</i>                 | <b>0.60* (0.38-0.97)</b><br><i>0.99 (0.64-1.52)</i>      | <b>0.60* (0.38-0.96)</b><br><i>0.78 (0.51-1.21)</i>      | 0.71 (0.36-1.38)<br><i>0.88 (0.54-1.43)</i>              | 0.27 (0.21-0.36)               | <b>0.47** (0.29-0.76)</b><br>0.77 (0.54-1.09)           | 0.62 (0.34-1.11)<br>1.03 (0.63-1.66)                     |
| Ba                  | 2.90 (1.31-6.41)<br><i>1.12 (0.65-1.94)</i>                 | 1.55 (1.11-2.17)<br><i>2.94 (1.95-4.41)</i>                 | 0.53 (0.26-1.11)<br><b>2.65** (1.31-15.34)</b>           | 0.53 (0.26-1.10)<br><b>2.41* (1.13-5.14)</b>             | 0.61 (0.26-1.42)<br><b>2.41* (1.21-4.81)</b>             | 0.85 (0.55-1.21)               | <b>0.29** (0.14-1.09)</b><br><b>0.55* (0.32-0.95)</b>   | 0.44 (0.18-1.10)<br>0.83 (0.39-1.76)                     |
| Tl                  | 0.29 (0.19-0.43)<br><i>0.34 (0.28-0.42)</i>                 | 0.22 (0.18-0.27)<br><i>0.31 (0.24-0.39)</i>                 | 0.77 (0.50-1.19)<br><i>0.90 (0.62-1.29)</i>              | 0.77 (0.51-1.16)<br><i>0.72 (0.50-1.04)</i>              | 0.81 (0.51-1.27)<br><i>0.72 (0.51-1.00)</i>              | 0.14 (0.10-0.18)               | <b>0.48** (0.30-0.77)</b><br><b>0.63** (0.45-0.88)</b>  | 0.70 (0.41-1.21)<br>0.91 (0.58-1.42)                     |
| Pb                  | 3.21 (2.14-4.80)<br><i>4.62 (3.41-6.27)</i>                 | 3.53 (2.75-4.53)<br><i>7.37 (5.34-9.36)</i>                 | 1.10 (0.51-2.58)<br><i>1.53 (0.97-2.41)</i>              | 1.10 (0.66-1.83)<br><i>1.04 (0.70-1.54)</i>              | 0.14 (-0.36-0.65)<br><i>1.04 (0.72-1.49)</i>             | 2.48 (1.93-3.18)               | 0.77 (0.47-1.28)<br>0.70 (0.49-1.01)                    | 0.82 (0.45-1.50)<br>0.75 (0.45-1.22)                     |
| U                   | 0.03 (0.02-0.06)<br><i>0.03 (0.02-0.04)</i>                 | 0.04 (0.02-0.06)<br><i>0.07 (0.05-0.10)</i>                 | 1.14 (0.51-2.58)<br><b>2.30** (1.33-3.95)</b>            | 1.13 (0.52-2.47)<br><b>2.19* (1.21-3.98)</b>             | 1.08 (0.36-3.25)<br><i>1.26** (0.45-2.07)</i>            | 0.09 (0.06-0.14)               | <b>2.90** (1.31-6.43)</b><br><b>2.54** (1.43-4.51)</b>  | <b>5.79*** (2.30-14.6)</b><br><b>5.11*** (2.39-10.9)</b> |

Data for children are in italics. # GM ratio of DIGGERS/CONTROL ADULTS in first row, GM ratio of DIGGERS/EXPOSED ADULTS in second row.

Trace metal concentrations are expressed as µg/g creatinine and presented as geometric means (GM) with 95% confidence intervals (CI). GM ratios are presented with 95% CI and shown in bold if significantly different from 1; \* p<0.05, \*\* p<0.01, \*\*\* p<0.001

**Supplementary Table 5:** Concentrations ( $\mu\text{g/dL}$ ) of trace metals in blood from 33 residents according to exposure

|           | Reference value <sup>†</sup> |                             | CONTROL AREA<br>(13 subjects) | EXPOSED AREA<br>(20 subjects) | GM ratio (95% CI)<br>EXPOSED/CONTROL |                            |                              |
|-----------|------------------------------|-----------------------------|-------------------------------|-------------------------------|--------------------------------------|----------------------------|------------------------------|
|           | Geometric mean               | 95 <sup>th</sup> percentile | GM (95% CI)                   | GM (95% CI)                   | crude                                | adjusted for age & sex     | adjusted for age, sex & plot |
| <b>Mn</b> | 0.77                         | 1.29                        | 1.15 (0.97-1.35)              | 1.12 (0.95-1.32)              | 0.98 (0.77-1.23)                     | 1.04 (0.83-1.31)           | 1.04 (0.84-1.28)             |
| <b>Co</b> | 0.03                         | 0.05                        | 0.18 (0.11-0.29)              | 1.02 (0.65-1.61)              | <b>5.72*** (2.94-11.2)</b>           | <b>6.76*** (3.31-13.8)</b> | <b>6.69*** (2.80-16.0)</b>   |
| <b>Cd</b> | 0.04                         | 0.17                        | 0.03 (0.02-0.04)              | 0.06 (0.04-0.08)              | <b>2.15** (1.22-3.81)</b>            | <b>1.67* (1.00-2.77)</b>   | <b>1.67* (1.06-2.64)</b>     |
| <b>Hg</b> | 0.14                         | 0.52                        | 0.29 (0.25-0.34)              | 0.20 (0.17-0.23)              | <b>0.69** (0.55-0.86)</b>            | <b>0.66** (0.52-0.85)</b>  | <b>0.63*** (0.47-0.86)</b>   |
| <b>Pb</b> | 1.88                         | 4.93                        | 5.70 (4.64-7.02)              | 8.92 (7.15-11.1)              | <b>1.56** (1.15-2.13)</b>            | <b>1.53* (1.10-2.13)</b>   | <b>1.52** (1.14-2.05)</b>    |

<sup>†</sup> According to Nisse et al. *Int. J. Hyg. Environ. Health* **220**, 341–363 (2017). (after rounding of their data in  $\mu\text{g/L}$ )

Trace metal concentrations are expressed as  $\mu\text{g/dL}$  and presented as geometric means (GM) with 95% confidence intervals (CI). GM ratios are presented with 95% CI and shown in bold if significantly different from 1; \*  $p < 0.05$ , \*\*  $p < 0.01$ , \*\*\*  $p < 0.001$



**Supplementary Table S6:** Concentrations ( $\mu\text{g/dL}$ ) of trace metals in blood from 33 residents according to exposure and stratified by age, and 10 artisanal mineworkers (diggers)

|           | CONTROL AREA<br>ADULTS N=7<br>CHILDREN N=6<br>GM (95% CI) | EXPOSED AREA<br>ADULTS N=15<br>CHILDREN N=5<br>GM (95% CI) | GM ratio (95% CI)<br>EXPOSED/CONTROL |                           |                                 | DIGGERS<br>N=10<br>GM (95% CI) | GM ratio (95% CI) #         |                             |
|-----------|-----------------------------------------------------------|------------------------------------------------------------|--------------------------------------|---------------------------|---------------------------------|--------------------------------|-----------------------------|-----------------------------|
|           |                                                           |                                                            | crude                                | adjusted for<br>age & sex | adjusted for<br>age, sex & plot |                                | crude                       | adjusted for<br>age & sex   |
| <b>Mn</b> | 1.03 (0.78-1.35)                                          | 1.16 (0.93-1.44)                                           | 1.13 (0.79-1.60)                     | 1.17 (0.88-1.56)          | 1.17 (0.92-1.49)                | 0.77 (0.67-0.88)               | 0.75 (0.54-1.04)            | 1.29 (0.89-1.86)            |
|           | <i>1.31 (1.08-1.59)</i>                                   | <i>1.02 (0.91-1.15)</i>                                    | <i>0.78* (0.63-0.95)</i>             | <i>0.68** (0.53-0.87)</i> | <i>0.68*** (0.58-0.80)</i>      |                                | <b>0.67** (0.51-0.87)</b>   | 1.10 (0.80-1.52)            |
| <b>Co</b> | 0.18 (0.06-0.49)                                          | 0.88 (0.53-1.49)                                           | <b>5.05** (1.95-13.0)</b>            | <b>5.66** (2.04-15.7)</b> | <b>4.81** (1.62-14.3)</b>       | 1.78 (0.93-3.40)               | <b>10.16*** (3.83-26.9)</b> | <b>13.14*** (3.25-53.1)</b> |
|           | <i>0.18 (0.13-0.26)</i>                                   | <i>1.57 (0.42-5.93)</i>                                    | <i>8.64 *** (3.05-24.5)</i>          | <i>7.45* (1.54-36.0)</i>  | <i>6.55** (1.95-21.8)</i>       |                                | 2.01 (0.90-4.52)            | 2.33 (0.67-8.04)            |
| <b>Cd</b> | 0.05 (0.03-0.08)                                          | 0.07 (0.05-0.10)                                           | 1.61 (0.93-2.79)                     | 1.45 (0.82-2.56)          | 1.45 (0.90-2.34)                | 0.12 (0.07-0.19)               | <b>2.56** (1.36-4.81)</b>   | 2.18 (0.90-5.35)            |
|           | <i>0.01 (0.00-0.03)</i>                                   | <i>0.03 (0.00-0.07)</i>                                    | <i>1.89 (0.74-4.82)</i>              | <i>1.56 (0.37-6.55)</i>   | <i>1.57 (0.61-4.01)</i>         |                                | 1.59 (0.94-2.68)            | 1.49 (0.68-3.30)            |
| <b>Hg</b> | 0.31 (0.23-0.42)                                          | 0.21 (0.17-0.25)                                           | <b>0.68* (0.49-0.94)</b>             | <b>0.68* (0.48-0.97)</b>  | <b>0.66* (0.46-0.93)</b>        | 0.39 (0.34-0.44)               | 1.25 (0.92-1.70)            | 1.09 (0.70-1.68)            |
|           | <i>0.27 (0.22-0.33)</i>                                   | <i>0.17 (0.13-0.24)</i>                                    | <i>0.64** (0.47-0.86)</i>            | <i>0.63* (0.40-0.99)</i>  | <i>0.58** (0.41-0.83)</i>       |                                | <b>1.85*** (1.43-2.39)</b>  | <b>1.60* (1.08-2.36)</b>    |
| <b>Pb</b> | 4.93 (3.86-6.28)                                          | 8.92 (6.24-12.8)                                           | <b>1.72* (1.11-2.66)</b>             | <b>1.63* (1.02-2.61)</b>  | <b>1.63* (1.09-2.41)</b>        | 7.34 (5.67-9.51)               | 1.49 (0.97-2.30)            | 1.39 (0.75-2.56)            |
|           | <i>6.77 (4.61-9.93)</i>                                   | <i>3.48 (3.38-11.3)</i>                                    | <i>1.54 (0.98-2.42)</i>              | <i>1.12 (0.64-1.96)</i>   | <i>1.13 (0.78-1.63)</i>         |                                | 0.87 (0.61-10.63)           | 0.86 (0.50-1.48)            |

*Data for children are in italics.*

# GM ratio of DIGGERS/CONTROL ADULTS in first row, GM ratio of DIGGERS/EXPOSED ADULTS in second row.

Trace metal concentrations are expressed as  $\mu\text{g/dL}$  and presented as geometric means (GM) with 95% confidence intervals (CI). GM ratios are presented with 95% CI and shown in bold if significantly different from 1; \*  $p < 0.05$ , \*\*  $p < 0.01$ , \*\*\*  $p < 0.001$
